# Supplementary material for: Electrorheological performance of multigram-scale mesoporous silica particles with different aspect ratios
Source: Royal Society of Chemistry journal article supplement (doi:10.1039/c5tc04124d), 2016-01-01
Supplement: c5tc04124d1.pdf [file c5tc04124d1.pdf]

Supporting Information for

**Electrorheological performance of multigram-scale mesoporous  
silica particles with different aspect ratios**

Chang-Min Yoon<sup>‡</sup>, Kisu Lee<sup>‡</sup>, Jungchul Noh, Seungae Lee and Jyongsik Jang<sup>\*</sup>

<sup>\*</sup>School of Chemical and Biological Engineering, College of Engineering, Seoul National University

(SNU), Seoul, Korea. Fax: 82 2 888 1604; Tel: 82 2 880 7069; E-mail: jsjang@plaza.snu.ac.kr

## XRD patterns of various mSiO<sub>2</sub> nanomaterials

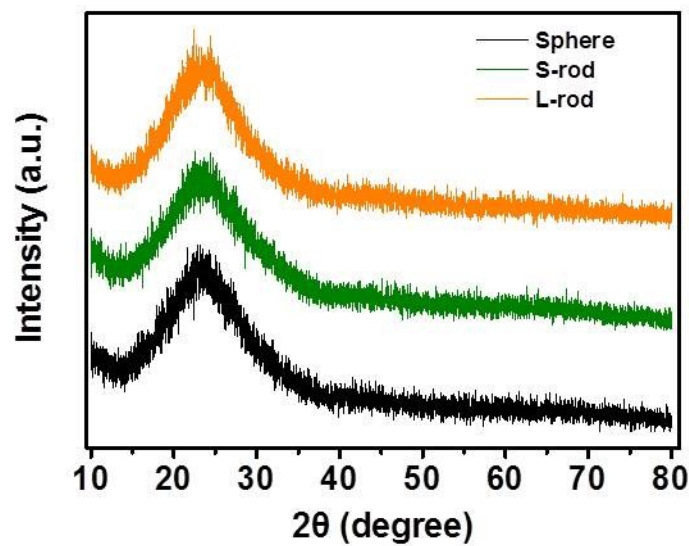

**Fig. S1** XRD spectra of various mSiO<sub>2</sub> nanomaterials.

X-ray diffraction (XRD) patterns of the mSiO<sub>2</sub> materials were used to determine the phase of the material. Weak broad peaks were detected for all samples between 20° and 30°, which indicated the amorphous phase of the material. This result suggests that three kinds of mSiO<sub>2</sub> nanomaterials were fabricated without any crystallinity.

## FT-IR spectra of various mSiO<sub>2</sub> nanomaterials

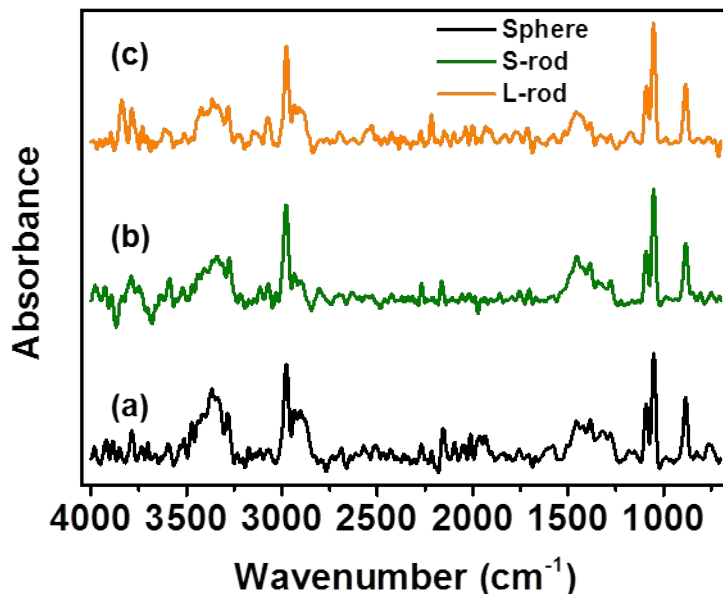

**Fig. S2** FT-IR spectra of a) sphere, b) S-rod, and c) L-rod mSiO<sub>2</sub> materials, respectively.

The FT-IR spectra data of three mSiO<sub>2</sub> showed characteristic peaks of SiO<sub>2</sub>, including Si–O–Si asymmetric stretching located at 1100 cm<sup>-1</sup>, Si–O stretching vibrations at near 1080–1050 cm<sup>-1</sup>, and Si–O bending near 900 cm<sup>-1</sup>. Moreover, peaks for water molecules were detected from the samples. In specific, all samples displayed O–H stretching frequency near 3850–3780 cm<sup>-1</sup>, broad –OH stretch peak near 3400 cm<sup>-1</sup>, and weak H–O–H bending at 1650 cm<sup>-1</sup>. Also, C–H stretching vibration peaks and CH<sub>2</sub> scissoring mode vibration peaks were detected near 2980 cm<sup>-1</sup> and 1460 cm<sup>-1</sup>, respectively. These carbon-related characteristic peaks were originated from the remaining CTAB surfactants. Considering these results, some water molecules and organic species were left in the samples even after the calcination and drying process. Such results might be ascribed to the presence of numerous pores and internal void created within mSiO<sub>2</sub> samples, which hindered the complete loss and combustion of organic and water molecules during the drying process.

## EDS elemental analysis of three mSiO<sub>2</sub> samples.

**Table S1** EDS analysis of three kinds of mSiO<sub>2</sub> materials<sup>a</sup>

| Sample | Si (atomic%) | O (atomic%) | C (atomic%) |
|--------|--------------|-------------|-------------|
| Sphere | 29.31        | 69.47       | 1.22        |
| S-rod  | 28.99        | 69.81       | 1.20        |
| L-rod  | 29.32        | 68.88       | 1.80        |

<sup>a</sup> Atomic weight percent was acquired by EDS mode with 45 s, 10  $\mu$ A of beam current, and 10 kV of accelerating voltage.

To gain more insight into the composition of leftover water and organic molecules, we have examined the atomic compositions of mSiO<sub>2</sub> samples with EDS analysis. As a result, there is an existence of excess amounts of O (without formation of SiO<sub>2</sub>) and C compositions. Judging from this result, there is some moisture and organic species remained in three mSiO<sub>2</sub> samples to induce the interfacial polarization and resulting ER activity under the applied electric field. Furthermore, these leftover species may be increased the conductivity of samples to induce the conductivity mismatch between particle and oil, which also contributed to the ER effect. It was noticeable that the amounts of all atomic compositions (Si, O, and C) were similar for all samples. In other word, differences in ER activity of various mSiO<sub>2</sub> materials were mostly affected by the variation in aspect ratio.

## Zero-field ER activity of various mSiO<sub>2</sub>-based ER fluids

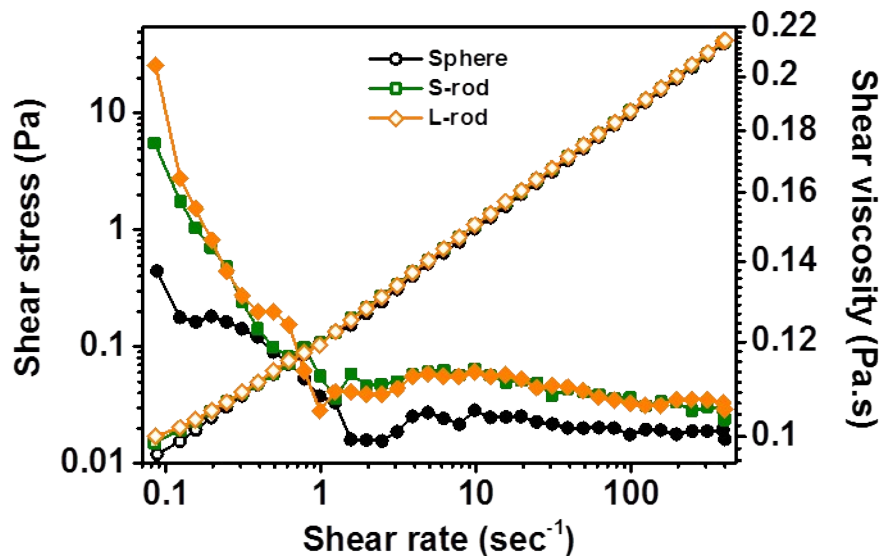

**Fig. S3** Zero-field shear stress (open symbol) and shear viscosity (closed symbol) of various mSiO<sub>2</sub>-based ER fluids (3.0 wt%) as a function of shear rate.

The zero-field ER activity of various mSiO<sub>2</sub>-based ER fluids were investigated to provide more rheological data of materials. Firstly, all shear stress values of three kinds of mSiO<sub>2</sub>-based ER fluids increased with increasing shear rate, which corresponded to the typical Newtonian fluid behavior. Since there was no applied electric field, shear stress values of samples showed small difference. However, L-rod mSiO<sub>2</sub>-based ER fluid exhibited slightly high shear stress compared to S-rod- and sphere-based ER fluids. This phenomenon is attributed to the increased flow resistance of high aspect ratio materials to exhibit increased shear stress against the hydrodynamic force. Under the same condition, the zero-field shear viscosities of samples decreased with increasing shear rate to manifest the typical shear thinning behavior.
